# Normal mammary epithelial cells promote carcinoma basement membrane invasion by inducing microtubule-rich protrusions

Meng-Horng Lee<sup>1,2</sup>, Pei-Hsun Wu<sup>1,2</sup>, Daniele Gilkes<sup>1,2</sup>, Ivie Aifuwa<sup>1,2</sup>, Denis Wirtz<sup>1,2,3</sup>

<sup>1</sup>Johns Hopkins Physical Sciences - Oncology Center, The Johns Hopkins University, Baltimore, Maryland 21218, USA

<sup>2</sup>Department of Chemical and Biomolecular Engineering, The Johns Hopkins University, Baltimore, Maryland 21218, USA

<sup>3</sup>Departments of Pathology and Oncology and Sidney Kimmel Comprehensive Cancer Center, The Johns Hopkins School of Medicine, Baltimore, Maryland 21205, USA

## Correspondence to:

Denis Wirtz, e-mail: wirtz@jhu.edu

**Keywords:** cancer invasion, cell-cell interaction, protrusion, microtubule, laminin

**Received:** March 11, 2015

**Accepted:** July 24, 2015

**Published:** August 03, 2015

## ABSTRACT

**Recent work suggests that the dissemination of tumor cells may occur in parallel with, and even precede, tumor growth. The mechanism for this early invasion is largely unknown. Here, we find that mammary epithelial cells (MECs) induce neighboring breast carcinoma cells (BCCs) to cross the basement membrane by secreting soluble laminin. Laminin continuously produced by MECs induce long membrane cellular protrusions in BCCs that promote their contractility and invasion into the surrounding matrix. These protrusions depend on microtubule bundles assembled *de novo* through laminin-integrin  $\beta 1$  signaling. These results describe how non-cancerous MECs can actively participate in the invasive process of BCCs.**

## INTRODUCTION

Local invasion is the first and critical step in cancer metastasis. Carcinoma cells must breach the basement membrane barriers in order to invade lymphatic or blood vessels located within the interstitial stroma, which mediates their distant metastasis [1]. Accumulating clinical observations suggest that the formation of long cellular protrusions is critical for cancer invasion [2, 3]. Several recent *ex vivo* studies recapitulate this protrusive morphology of cells in three dimensional (3D) stromal type I collagen [4–9]. In contrast, most cells that fail to form protrusions demonstrate inefficient invasion in gels comprised of basement membrane proteins [10–12]. Here, we hypothesize that specific soluble factors may be required to sufficiently stimulate carcinoma cells to form invasive protrusions to overcome the basement membrane barrier.

Accumulating evidence suggests that normal cells actively participate in tumorigenesis and influence cancer invasion [13–16]. For example, immune cells [17] (e.g. macrophages) and cells of the connective tissue (e.g. cancer-associated fibroblasts) are coopted and recruited by tumor cells to enhance the growth and invasion of cancer cells [18]. However, recent work suggests that the dissemination of individual cancer cells may occur in parallel with tumor growth [19–21], and not following tumor growth. The

mechanism by which cancer cell invasion precedes tumor growth is a matter of intense investigation. Upon oncogenic transformation and before invasion, a large fraction of carcinoma cells are in contact with non-cancerous epithelial cells [22, 23]. We previously demonstrated that mammary epithelial cells (MECs) surrounding a single carcinoma cell promote the spreading of that cell within the normal epithelium [24]. Here, we asked whether surrounding MECs also participated in the early invasion of breast carcinoma cells to cross the basement membrane, the first barrier that separates cancer cells surrounded by normal epithelial cells and connective tissues.

Our results indicate that MECs actively prompt neighboring BCCs to cross the basement membrane. Soluble factors secreted by MECs induce the formation of long thick membrane protrusions that endow BCCs with an aggressively invasive phenotype. Biochemical analysis suggests that soluble laminins secreted by MECs is responsible for this invasive, protruded phenotype. Importantly, MECs are not coopted by the cancer cells to produce laminins. Rather, MECs continuously secrete soluble laminins, which does not influence their own physiology. MEC-induced protrusions in BCCs are filled with thick microtubule bundles wrapped by a thin cortex of actin filaments, a cytoskeletal organization distinct from that in standard cellular protrusions, including filopodia

and lamellipodia. The induction of long microtubule-rich extensions is required for the invasion of BCCs across the basement membrane. These results suggest that the migration of BCCs through the basement membrane and early local invasion depend critically on biochemical stimulation from neighboring MECs.

## RESULTS

### Non-cancer epithelial cells induce an invasive phenotype in carcinoma cells

To investigate whether mammary epithelial cells (MECs) surrounding transformed breast carcinoma cells (BCCs) could actively participate in the invasive process of these BCCs, we devised a co-culture system composed of a single layer of human MECs (MCF10A cells) containing inter-dispersed human BCCs (MDA-MB-231). We found that a significantly increased number of MDA-MB-231 cells invaded through the Boyden chamber coated with matrigel when co-cultured with MCF10A cells (Figure 1B) compared to MDA-MB-231 cells in the absence of MCF10A cells.

We next determined whether direct physical contact between MDA-MB-231 cells and MCF10A cells was required or whether soluble factors secreted by MCF10A cells could be sufficient to promote invasion. Conditioned medium (CM) harvested from MCF10A cells alone was sufficient to promote the invasion of MDA-MB-231 cells to the same extent as in the co-culture system described above (Figure 1A and 1B), indicating that this heterotypic intercellular signaling did not require direct physical contact between cancer and non-cancer cells.

To image invasive cells along the (invasive) z-axis with high spatial resolution, we built a redundant parallelepipedic chamber ( $20 \times 5 \times 10$  mm), where two opposite side faces were made of 0.13–0.16 mm thick coverslips, which enabled us to image invading cells from the side of the matrix (Figure 1C). We confirmed that MDA-MB-231 cells treated with MCF10A CM invaded matrigel more efficiently than non-treated cells. Interestingly, we found that, in the absence of CM, the invasive distance of round MDA-MB-231 cells was minimal and the majority of MDA-MB-231 cells that could invade matrigel formed extended protrusions (Figure 1D). In contrast, stimulation by MCF10A CM switched most MDA-MB-231 cells to a protrusive phenotype and the average invasive depth increased two-fold compared to control cells (Figure 1D).

Next, we placed MDA-MB-231 cells inside 3D matrigel (Figure 1E) to carefully examine 3D migratory behavior and cell morphology in 3D gels. We found that MDA-MB-231 cells that had been rendered protrusive by MCF10A CM efficiently moved through the matrix, while non-protrusive cells in control fresh medium rarely moved, at least within a 16 h imaging time (Figure 1F and 1G; Movie S1 and S2). Notably, in the absence of

MCF-10A CM, most MDA-MB-231 cells (>90%) adopted a round morphology and only a small fraction of cells (<10%) were able to extend protrusions, in agreement with a recent study [10]. The treatment of MDA-MB-231 cells with MCF10A CM completely flipped this ratio of non-protrusive-to-protrusive MDA-MB-231 cells (Figure 1F).

### Non-cancer epithelial cells induce a prominent protrusive phenotype in carcinoma cells

We asked whether non-cancer mammary epithelial cells (MECs) could actively switch surrounding transformed breast carcinoma cells (BCCs) to a protrusive phenotype. To this end, we co-cultured MDA-MB-231 cells with MCF10A cells. We found that when co-cultured with MCF10A cells, MDA-MB-231 cells readily formed long protrusions (Figure 2A) that were largely absent from MDA-MB-231 cells when cultured alone (Figure 2B). Furthermore, conditioned medium (CM) harvested from MCF10A cells was sufficient to induce the protrusive phenotype in MDA-MB-231 cells (Figure 2B, Supplementary Movies S3 and S4).

Importantly, this CM did not induce a protrusive phenotype in MCF10A cells themselves (Supplementary Figure S1). Moreover, CM harvested from MDA-MB-231 cells did not induce a protrusive phenotype among themselves or in MCF10A cells (Figure 2B, Supplementary Figure S1A). The same protrusive phenotype in MDA-MB-231 cells was induced by other human MECs, MCF12A (Supplementary Figure S1B–S1D), indicating consistency of our findings. Finally, CM harvested from MCF10A cells induced a protrusive phenotype in BT-549 cells, which are also breast carcinoma cells isolated from the primary tumor (Supplementary Figure S1E–S1G), which again indicated consistency of our findings.

We next determined the extent by which BCCs were made to switch to a protrusive phenotype by MECs. We comprehensively quantified the morphology of MDA-MB-231 cells using automated cell morphometry. Cell spreading area and two additional descriptors of the morphology of cell extensions including cell circularity and roughness of the cell edge were computed. After exposure to CMs from either MCF10A cells or MCF12A cells, 80% of MDA-MB-231 cells demonstrated low circularity (< 0.2) and high roughness of cell shape (> 0.4) (Figure 2D–2F). To consistently define protrusions in an unbiased, unsupervised manner, fluorescent images of cells stained with a non-specific cytoplasmic dye were mathematically converted to topological skeletons, where cell body and protrusions were clearly segmented (Figure 2C) [25]. The average length of protrusions and branching of protrusions both significantly increased in CM-stimulated MDA-MB-231 cells compared to non-stimulated MDA-MB-231 cells (Figure 2G and 2I). In contrast, the number of protrusions slightly decreased in cells cultured in CM (Figure 2H). These results suggest that MDA-MB-231 cells minimize the total number of protrusions to support the formation of few, long protrusions.

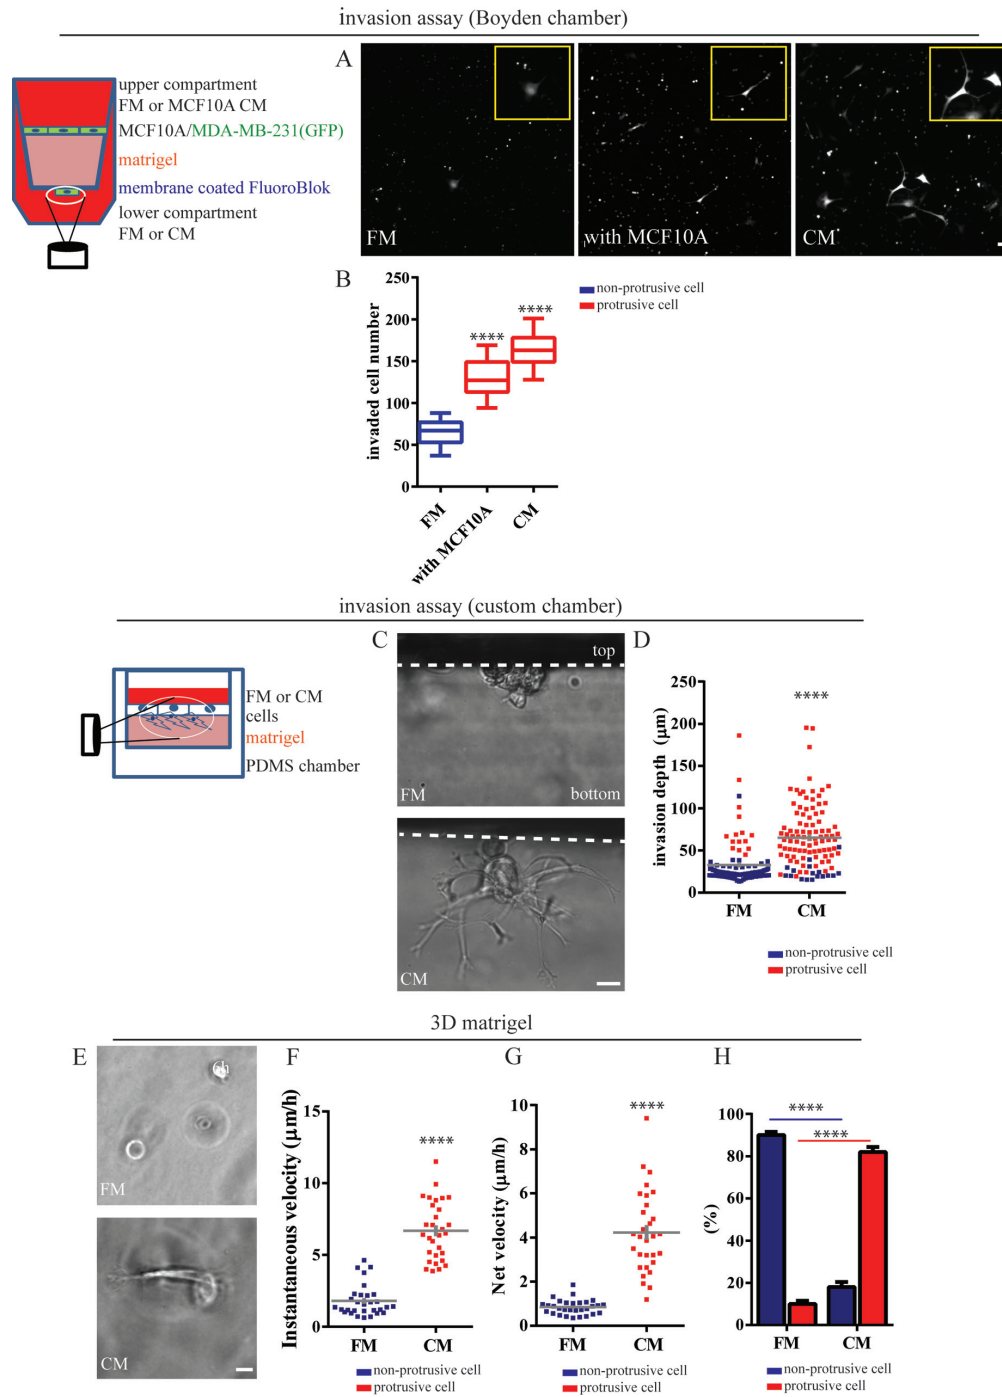

**Figure 1: Mammary epithelial cells induce an invasive phenotype in breast carcinoma cells.** A. and B. MDA-MB-231 cells stably expressing EGFP were seeded alone or with MCF10A cells on top of a Boyden chamber coated with a thick layer of matrigel. During invasion, we added the same (regular fresh medium, FM or MCF10A conditioned medium, CM) amount of medium in the upper and lower compartments of the chamber. (A) Representative images of invaded MDA-MB-231 cells at the bottom membrane of the chamber. Scale bar, 20  $\mu\text{m}$ . (B) Average number of invaded cells per field of view. C. and D. MDA-MB-231 cells were placed on the top of matrigel within a custom chamber. (C) Representative morphology of invading cells in FM and CM imaged from the side of the matrix for improved spatial resolution (Scale bar, 20  $\mu\text{m}$ ) and (D) invasion depth of individual BCCs in FM or CM. Color coding of the dots specify whether cells were round or protrusive. E–H. MDA-MB-231 cells were embedded inside a three-dimensional (3D) matrigel matrix in the presence of FM or CM. (E) Representative spreading morphology of MDA-MB-231 cells in FM (top) or CM (bottom) under phase-contrast microscopy. Scale bar, 20  $\mu\text{m}$ . (F) Fractions of non-protrusive (blue) and protrusive (red) MDA-MB-231 cells inside a 3D matrigel in FM and CM. (G) Instantaneous and (H) net velocity of MDA-MB-231 cells inside the three-dimensional (matrigel) matrix in the presence in FM or CM. \*\*\*\*.  $P < 0.0001$ .

### A co-culture (MDA-MB-231/MCF10A)

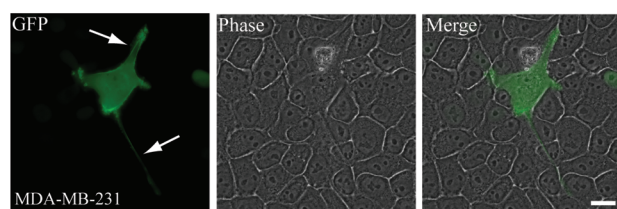

### B conditioned medium

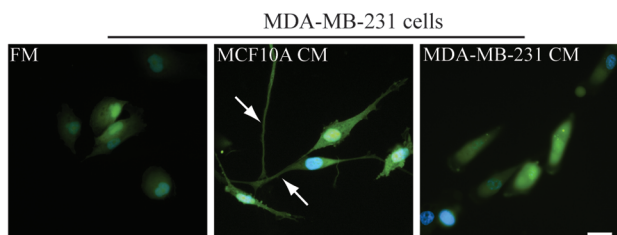

### C

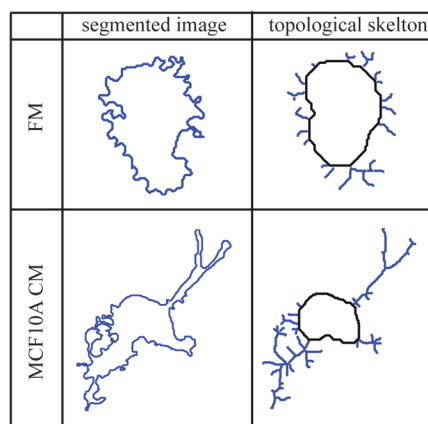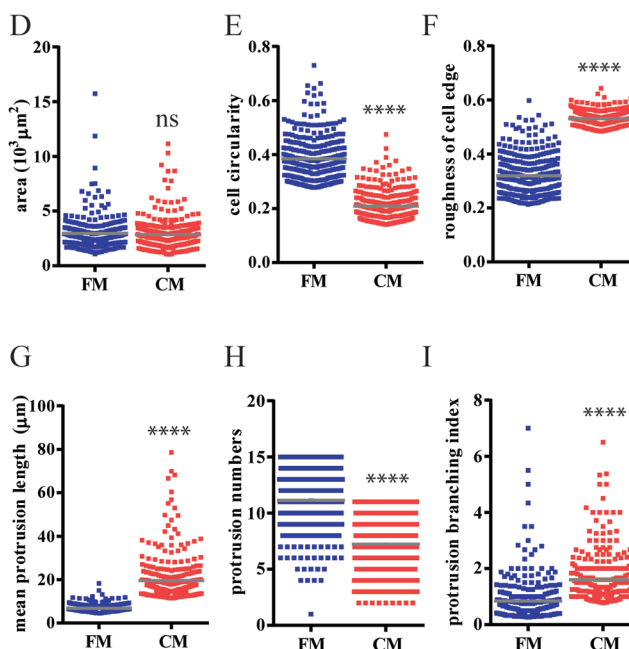

**Figure 2: Mammary epithelium cells switch breast carcinoma cells to a highly protrusive phenotype.** A. and B. MDA-MB-231 cells stably expressing EGFP were either (A) co-cultured with a layer of confluent MCF10A cells or (B) incubated with MCF10A CM. C-I. Computer-segmented MDA-MB-231 cells in FM or CM and associated skeleton plots generated by a custom MATLAB-based software. This skeletonization allows us to unambiguously define the length and number of protrusions per cell. (D) Carcinoma cell spreading area, (E) circularity, and (F) roughness of cell edges in FM and CM were analyzed based on segmented cell images. (G) Mean length of protrusions, (H) mean number of protrusions and (I) protrusion branching index of cells in FM and CM were calculated after conversion of segmented cell images into skeleton plots and automated computation.  $n = 300$  cells; \*\*\*\*: $P < 0.0001$ .

### Soluble laminin secreted by non-cancer epithelial cells is required to switch carcinoma cells to a protrusive and invasive phenotype

To determine the specific factors secreted by MECs that could stimulate BCCs to form long protrusions and invade their surrounding matrix, we passed MCF10A CM through size exclusion filters to segregate molecules with a molecular weight either above 100 kD or above 50 kD in order to estimate the molecular weight range of factors secreted by MCF10A cells. We found that the removal of proteins of molecular weight >100 kD from MCF10A CM prevented the formation of

CM-induced protrusions (Figure 3C), as evidenced by a short mean protrusive length in MDA-MB-231 cells (Figure 3D). Correspondingly, the enhanced invasion of MDA-MB-231 was abolished when treated with filtered MCF10A CM (Figure 3E). The results suggested that secreted molecule(s) with a molecular weight >100kD, such as some extracellular matrix (ECM) components, was required to induce the both protrusive and invasive phenotype.

Since several studies have indicated a difference in the expression of laminin between MECs and BCCs and have suggestion a function in tumor progression [26–28], we examined whether laminin is involved to promote protrusive

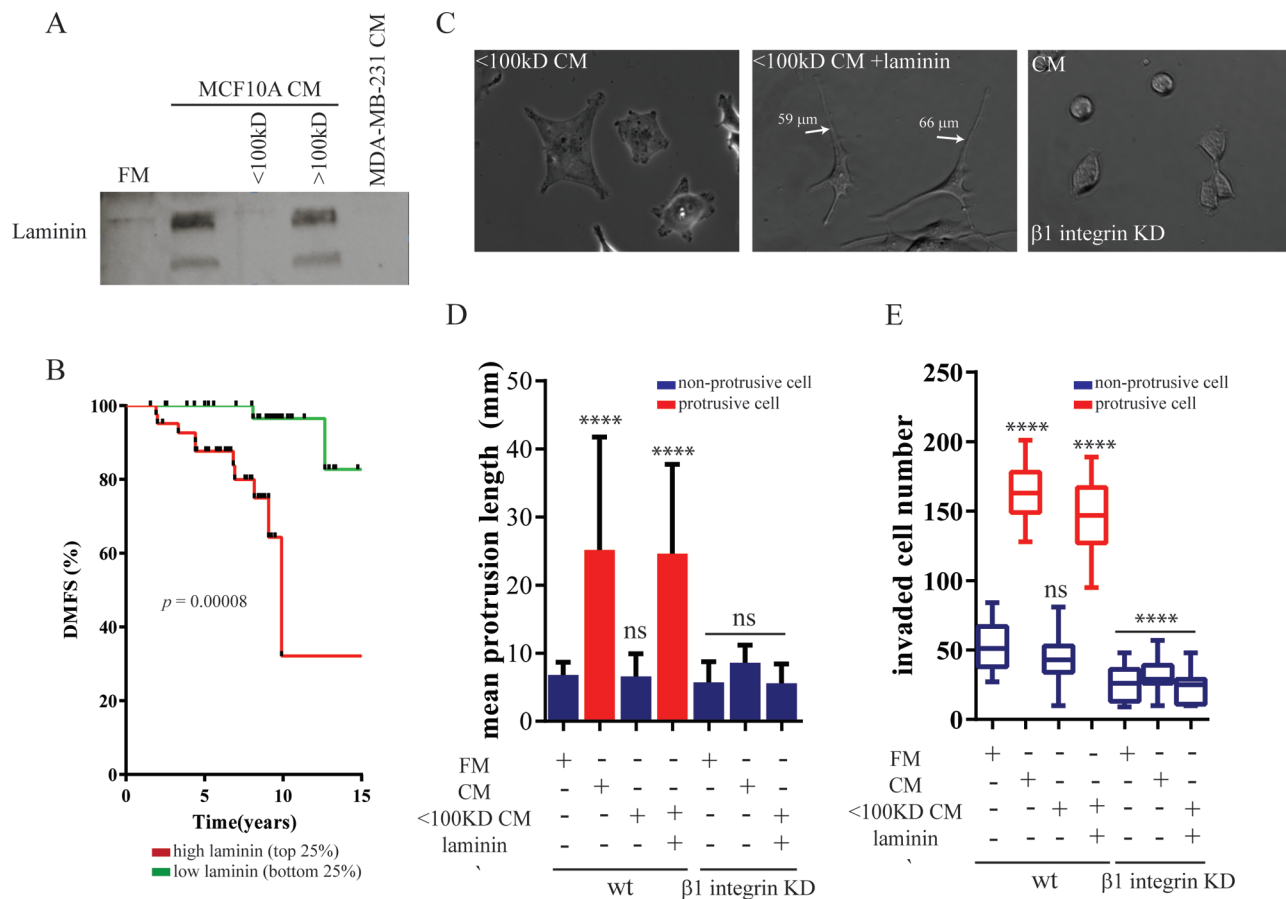

**Figure 3: Soluble laminin secreted by mammary epithelial cells induces a protrusive phenotype in breast carcinoma cells.** **A.** MCF10A-CM was passed through molecular-cutoff filters that selectively excluded molecules above 100 kDa. MCF10A-CM and filtered CM were analyzed by western blotting using an antibody against laminin. **B.** Kaplan–Meier curves were constructed based on the GOBO database to analyze the association of *laminin* mRNA levels with distant metastasis-free survival (DMFS) of breast cancers in the early stage. Statistical analysis was performed using log-rank tests. **C–E.** MDA-MB-231 cells were transduced with recombinant lentivirus encoding for shRNA targeting integrin  $\beta_1$  (**C**) Representative spreading images, (**D**) mean protrusive length of control or  $\beta_1$  integrin-depleted MDA-MB-231 cells incubated with MCF10A-CM, filtered CM or supplied with 5  $\mu\text{g/ml}$  laminin. (**E**) Total number of invaded MDA-MB-231 cells in the Boyden chamber coated with a thick layer of matrigel in the same conditions. \*\*\*\*: $P < 0.0001$ ; \*\*: $P < 0.01$ .

and invasive phenotype of BCCs. We confirmed that MCF10A cells secreted a large amount of laminin that was absent from regular fresh medium or MDA-MB-231 CM (Figure 3A). Furthermore, adding purified laminin restored the ability of filtered MCF10A CM depleted of proteins >100 kD to induce a protrusive and invasive phenotype in MDA-MB-231 cells. Meanwhile, the addition of laminin also restored the function of filtered MCF10A CM to promote the invasion of MDA-MB-231 cells (Figure 4E). Notably, the addition of laminin into the regular fresh medium failed to induce long protrusion formation or promote the invasion on MDA-MB-231 cells. These data suggested that laminin present in MCF10A CM was required but not sufficient for the enhanced protrusion formation and invasion of MDA-MB-231 cells.

To further determine the clinical relevance of the correlation between the presence of laminin and early invasion, we examined survival data of breast cancer patients diagnosed with early-stage disease. Patients were stratified according to their expression of laminin.

Kaplan-Meier analysis revealed that early-stage breast cancer patients with a high expression of laminin (>75% of median) correlated with decreased distant-free metastasis compared to cancers with low laminin expression (Figure 3B).

Transmembrane cell-receptor integrins  $\alpha_1\beta_1$ ,  $\alpha_3\beta_1$ ,  $\alpha_6\beta_1$  and  $\alpha_6\beta_4$  serve as laminin receptors [29, 30]. We found that MDA-MB-231 cells highly expressed mRNA of integrins  $\alpha_6$  and  $\beta_1$  (Supplementary Figure S2A). Therefore, to block laminin-receptor binding we expressed shRNA targeting *Integrin  $\beta_1$*  or *Integrin  $\alpha_6$* . Depleting integrin  $\beta_1$ , but not integrin  $\alpha_6$ , in MDA-MB-231 cells efficiently inhibited the formation of MCF10A (laminin)-induced long protrusions (Figure 4C, and 4D; Supplementary Figure S2B–S2F), suggesting that alpha integrin isoforms are redundancy for laminin binding. Inhibiting MCF10A-induced morphological change by either depleting laminin or abrogating laminin-integrin  $\beta_1$  interactions reduced MCF10A-enhanced invasion (Figure 3E). Hence, the formation of protrusions in BCCs by laminin secreted by MECs is required to promote cancer cell invasion.

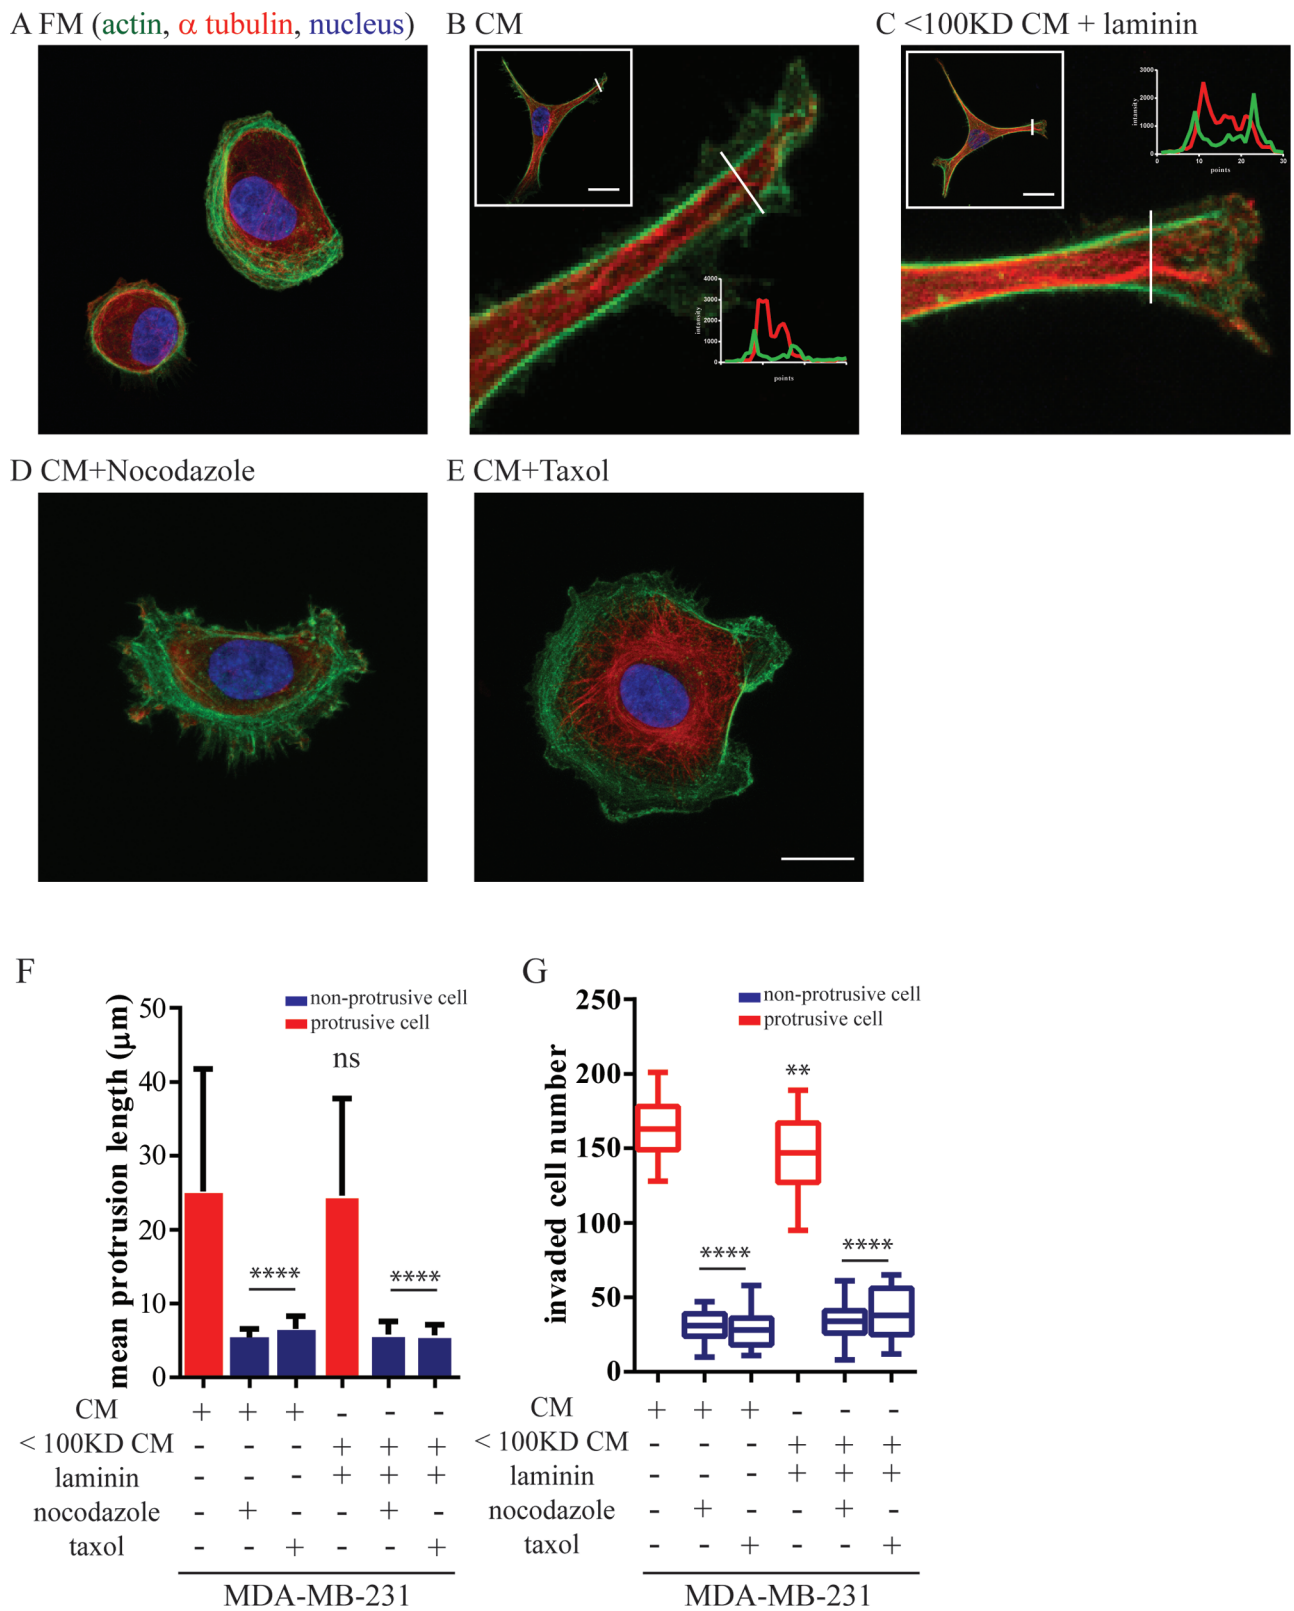

**Figure 4: Mammary epithelium cells-induced protrusions depend on microtubule dynamics.** MDA-MB-231 cells were incubated with MCF10A CM or filtered CM with a cutoff molecular weight of 100 kDa supplied with 5  $\mu\text{g}/\text{ml}$  purified laminin in the present or absent of nocodazole (125 nM) and taxol (500 nM). **A–E.** Confocal image of the main protrusion extended from MDA-MB-231. Cells were stained for  $\alpha$ -tubulin (red) and F-actin (green); nuclei were visualized with Hoechst 33342 (blue). Scale bar, 20  $\mu\text{m}$ . **F.** Mean protrusive length and **G.** total number of invaded MDA-MB-231 cells through the Boyden chamber coated with a thick layer of matrigel. \*\*\*\*: $P < 0.0001$ ; \*\*: $P < 0.01$ .

## **The formation of long protrusions in carcinoma cells is essential to promote their invasion**

We next determined the molecular mechanism by which BCCs produced long protrusions in the presence of MECs. Confocal optical sectioning showed that the long protrusions in MDA-MB-231 stimulated by MCF10A-CM were mainly composed of microtubule bundles that were circumferentially aligned along the main protrusions. These microtubules were surrounded by cortical actin filaments (Figure 4B and insets) and also aligned along the long axis of the main protrusions. The stimulation of MDA-MB-231 cells supplemented with purified laminin had the same molecular and quantitative effect as CM from MCF-10A cells to promote microtubule-based protrusions (Figure 4C). This cytoskeletal organization is strikingly different from typical lamellipodial structures terminated by small filopodial extensions in control non-stimulated carcinoma cells (Figure 4A) and other types of mesenchymal cells, including fibroblasts and fibrosarcoma cells [31, 32]. This non-conventional cytoskeletal organization in MCF10A-stimulated MDA-MB-231 cells suggested a central role for microtubules in the generation and/or maintenance of their long protrusions.

Inhibition of microtubule formation and dynamics during MDA-MB-231 spreading using the microtubule-depolymerization drug nocodazole and microtubule-stabilizing drug taxol both abrogated protrusion formation, as indicated by the decreased mean protrusive length of MDA-MB-231 cells in the presence of MCF10A cells (Figure 4F). Nocodazole and taxol treatments also eliminated pre-existing, MCF10A-induced long protrusions (Supplementary Figure S3A–S3C), indicating that microtubules supported both the development and the maintenance of long protrusions in MEC-stimulated BCCs. In addition, nocodazole and taxol treatments also reduced MCF10A-enhanced invasion (Figure 4G) in MDA-MB-231 cells, indicating that microtubule-based protrusions are essential for the enhanced invasion of BCCs induced by surrounding epithelial cells.

## **The contraction of the carcinoma cell body is necessary for its protrusion-led invasion**

Next, we asked how the MEC-induced protrusions of BCCs altered migration to maximize their invasion. We found that, when MCF10A-induced protrusive MDA-MB-231 cells held their longest protrusion for a long period of time, the cell body still moved or suddenly contracted towards the protrusion tip (Figure 5A and Supplementary Movies S2), which caused the net displacement of the cell. This cell body traction is critical for efficient invasion. Indeed, MCF10A-stimulated MDA-MB-231 cells treated with ROCK inhibitor Y-27632 to inhibit their contractility [11, 33] failed to form an invasive phenotype (Figure 5F and Supplementary Movies S5). Moreover, the addition of

a Rho activator CN03 in CM-stimulated MDA-MB-231 cells also prevented cells to invade matrigel (Figure 5F). We found that Rho activation by CN03 in MCF10A-CM prevented MDA-MB-231 cells to form a protrusive morphology and reduced their ability to invade (Figure 5D and 5E). Across all conditions we examined in this study, we found that invasive BCCs were accompanied by a protrusive morphology, indicating that the formation of microtubule-based protrusions is pre-required for MEC-induced invasion of BCCs.

## **DISCUSSION**

Here, we provide evidence that non-cancer mammary epithelial cells (MECs) can actively enhance the ability of breast carcinoma cells (BCCs) to cross the basement membrane. MEC-induced enhanced invasion is achieved by inducing the formation of long, persistent membrane protrusions in BCCs. This stimulation is unidirectional, going from the normal epithelial cells to cancer cells, i.e. this is not a result of a cooptation by cancer cells. This protrusive phenotype is triggered by laminin-integrin interactions at the surface of carcinoma cells, as evidenced by removing laminin from the conditioned medium obtained from MECs or by depleting the laminin-receptor  $\beta 1$  integrin in carcinoma cells. The protrusive morphology of carcinoma cells is initiated and maintained by microtubule bundles, while the inhibition of actin dynamics causes only a marginal effect on these long protrusions.

Clinical investigations have correlated the presence of laminin to breast cancer invasion [34, 35]. Our results suggest that laminin secreted by MECs is sufficient to promote the invasion of BCCs, arguing that it may not be necessary for these cells to secrete their own laminin [36, 37]. In addition, the fact that CM harvested from MECs is sufficient to induce a combined protrusive/invasive phenotype in carcinoma cells further indicates that laminin secreted by epithelial cells does not require paracrine stimulation from carcinoma cells. What determines laminin-mediated invasion is whether carcinoma cells form long, microtubule-filled protrusions in the laminin-rich environment provided by surrounding MECs. Inhibiting morphological changes induced in carcinoma cells by either interfering with laminin-integrin interactions or inhibiting microtubule dynamics prevents laminin-mediated cancer cell invasion.

Interestingly, MEC-stimulated protrusions in carcinoma cells feature a unique cytoskeletal organization, comprised of extended, tightly packed microtubule bundles which form a core surrounded by a dense cortex of actin filaments. Our results highlight several important mediators for these functionally relevant long protrusions. First, laminin-integrin interactions are sufficient for the formation of microtubule bundles. Indeed, BCCs lacking integrin  $\beta 1$  fail to extend microtubules to the cell cortex in

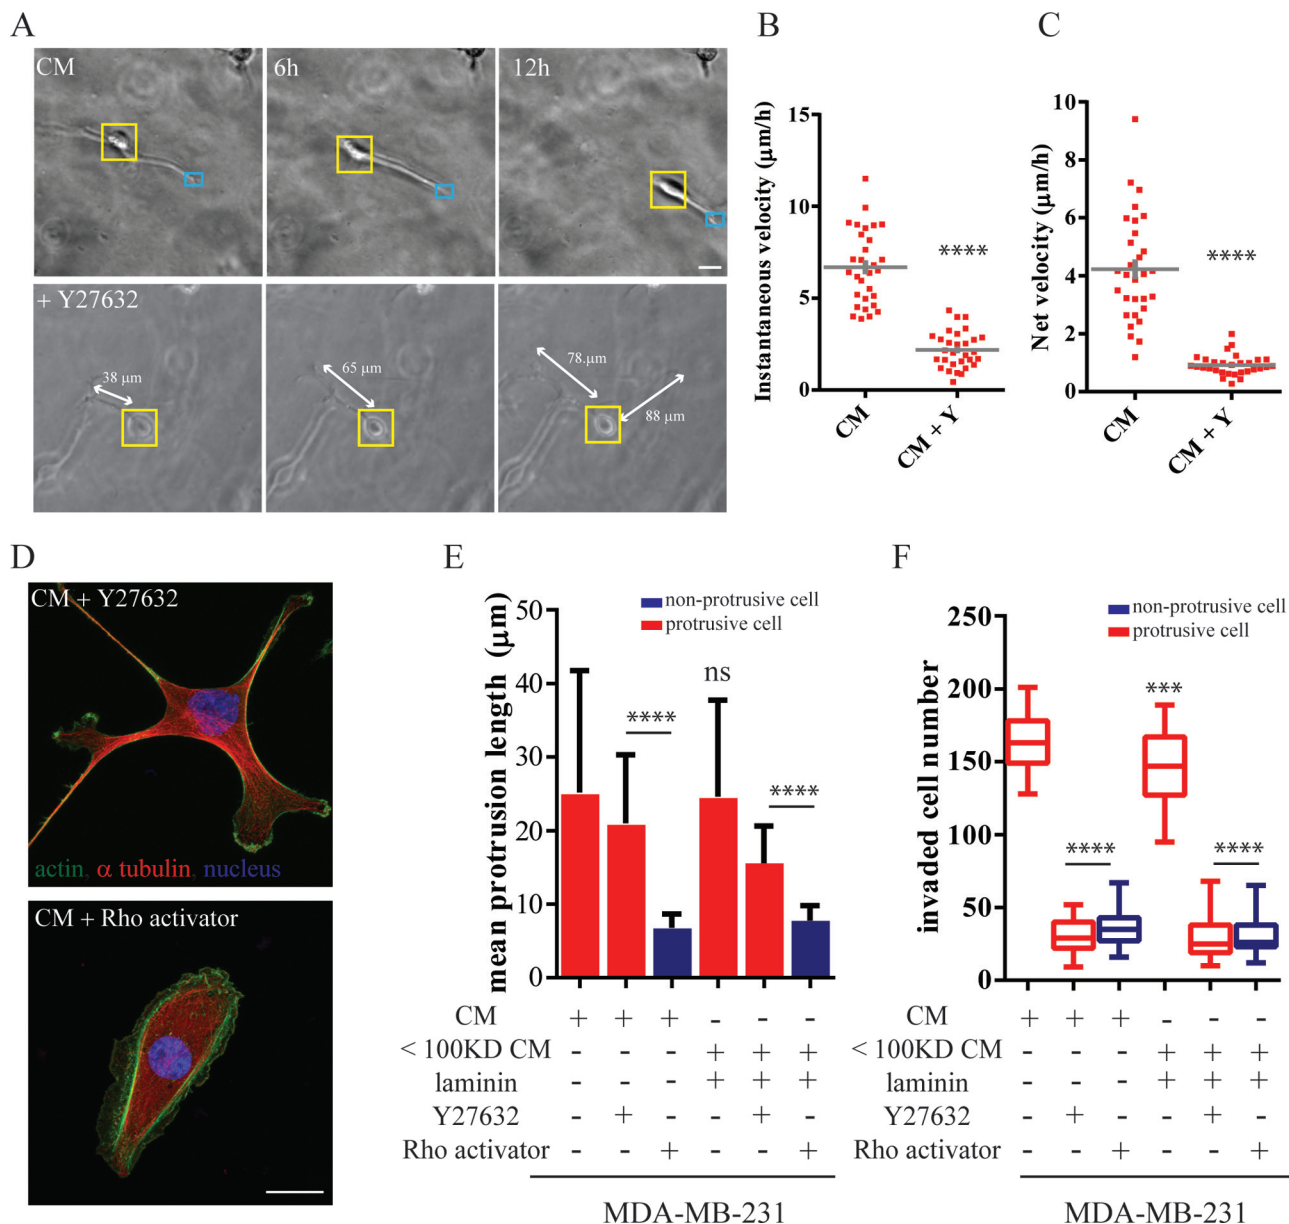

**Figure 5: Cell contraction is necessary for protrusion-led invasion.** **A.** Time-dependent morphological changes of MDA-MB-231 within a 3D matrigel matrix treated with MCF10A-CM or CM supplemented with 10  $\mu$ M ROCK inhibitor Y-27632. Imaging under phase-contrast microscopy, Scale bar, 20  $\mu$ m. **B.** Instantaneous and **C.** net velocity of individual MDA-MB-231 migrating inside a three-dimensional matrigel matrix. **D–F.** MDA-MB-231 cells treated with MCF10A-CM supplemented with either Y-27632 or Rho activator CN03. **(D)** Cells were stained for  $\alpha$ -tubulin (red) and actin (green). Nuclei were visualized with Hoechst 33342 (blue). Scale bar, 20  $\mu$ m. **(E)** The quantitative mean protrusive length and **(F)** the total number of invaded MDA-MB-231 in the Boyden chamber coated with a layer of thick matrigel. \*\*\*\*: $P < 0.0001$ ; \*\*\*: $P < 0.001$

laminin-enriched conditioned medium. This finding is further supported by a recent study showing that laminin-integrin interactions promote the localization of microtubule-associated proteins (MAPs) to the cell cortex, which anchor microtubules to the cell edges [38]. Secondly, the deactivation of Rho is necessary for protrusion formation, as evidenced that the addition of Rho activator prevents BCCs to form microtubule-based protrusions in CM. Interestingly, several studies demonstrate that the addition of laminin cause the inactivation of Rho in neuron cells [39–42]. Hence,

a full mechanism of microtubule assembly and bundling and Rho signaling may be managed by laminin-integrin  $\beta$ 1 interactions.

The commonly accepted dogma considers invasion as a late event in breast tumor progression [20]. However, this conventional wisdom has been challenged by clinical studies showing the existence of early dissemination as evidenced by the appearance of metastasis after surgical removal of small breast tumors in node-negative breast cancer patients and the metastasis of unknown primary tumor [43–45]. The effect



of MECs could provide a mechanism allowing the early invasion of BCCs. Particularly, the effect of MECs would efficiently affect individual carcinoma cells, circumventing a requirement for a larger tumor to form and generate sufficient diversity for effective invasion [46].

## MATERIALS AND METHODS

### Cell culture and co-culture

Non-cancerous human breast epithelial cells (MCF10A and MCF12A), transformed metastatic human breast carcinoma cells (MDA-MB-231 and BT-549) were obtained from American Type Culture Collection (ATCC, Manassas, VA). MCF10A and MCF12A were cultured and passed in 5% horse serum supplemented with 20 ng/ml hEGF, 10 µg/ml insulin, 100 ng/ml cholera toxin, and 0.5 µg/ml hydrocortisone. MDA-MB-231 and BT-549 cells were maintained in DMEM supplemented with 10% fetal bovine serum. MCF7 cells were maintained in DMEM supplemented with 10% fetal bovine serum and 10 µg/ml insulin.

The co-culture experiment was performed as previously described [24]. Briefly, MDA-MB-231 cells were co-seeded with MCF10A cells in a 1:50 ratio in MCF10A growth medium. The cell morphology was monitored using fluorescence microscopy following two days of cell culture.

For harvesting conditioned medium (CM),  $3 \times 10^6$  non-cancerous epithelial cells were seeded in a 10 mm-culture dish. After 2 days culturing, conditioned medium was collected and immediately filtered through a 0.45-µm filter (Millipore, Bedford, MA, USA) to remove cells debris. To maintain consistent conditions, MDA-MB-231 cells seeded with MCF10A medium was used as experimental control. To remove high molecular weight proteins, MCF10A CM was passed through the Amico Ultra centrifugal filter (Millipore).

### Automated quantification of protrusive cell morphology

The cellular morphological features were analyzed from fluorescent images using a custom- MTALAB-based software [47, 48]. First, the boundary of each individual cell stained for F-actin was segmented. The “roughness” of cell shape was computed by recording the positions of points along the cell boundary and then computing the ratio of the standard deviation to the mean of the distance of each point to the cell center. This roughness is low for a cell with a smooth morphology, and high for a cell showing many protrusions. To further quantify protrusive features, cell morphology and protrusions were mathematically converted into topological skeletons [25]. A line that extended from the cell body was defined as a protrusion. The length of each individual protrusion and the total number of protrusions per cell was computed.

### Lentivirus production and transduction

Lentiviral vector expressing shRNA targeting *Integrin β1* was a gift from Dr. Gregory D. Longmore’s lab. The shRNA vector targeting *Integrin α6* was purchased from Sigma-Aldrich (St. Louis, MO, USA). The second generation lentiviruse was produced as previously described [49]. Briefly, 293T cells (ATCC) were transiently co-transfected with three plasmids including lentiviral vector, (R 8.91 and pMDG-VSVG using calcium phosphate precipitation method. After 22–24 h transfection, the medium was replaced with fresh medium and lentiviral particles were harvested 24 h later and immediately filtered through 0.45 µm filter (Millipore) to remove cells debris, then stored at –80°C. For transduction,  $1 \times 10^5$  cells in 35-mm culture dish were repeatedly transduced with lentivirus with 8 µg/ml polybrene to reach high transduction (>80%).

### Immunofluorescence imaging and live-cell microscopy

For immunofluorescence staining, cells were fixed with 4% paraformaldehyde, permeablized with 0.3% triton x-100, and incubated with the mouse anti-α-tubulin (1:5000, room temperature for 1 h, Abcam, Cambridge, MA, USA), phalloidin (1:40, room temperature for 20 min; Invitrogen, Eugene, OR), and Hoechst33342 (1:1000, room temperature for 10 min; Invitrogen). Images of the stained cells were acquired using Nikon A1 confocal microscope (Nikon, Melville, NY, USA) equipped with a 60x plan lens (N.A. 1.2).

For live-cell imaging, cells were embedded in matrigel and plated in a 96-well glass bottom dish (MatTek, Ashland, MA, USA) and incubated for 24 h before imaging. To avoid possible edge effects from the glass bottom, the imaged cells were at least 100 µm above the glass bottom. Time-lapse images were collected every 5 min for 16 h using a Nikon TE2000 microscope equipped with a 10× objective (Nikon) and a Cascade 1K CCD camera (Roper Scientific, Tucson, AZ). Series of time-lapsed images were processed and analysed using the NIS-Elements AR software (Nikon) and a custom Matlab (Mathwork, Natick, MA) analysis software.

### Survival analysis

Using the Gene Expression-Based Outcome for Breast Cancer Online (GOBO) database (1881 breast cancer patient samples; <http://co.bmc.lu.se/gobo>) in which the gene expression were measured on Affymetrix HG-U133A arrays [50], we analyzed early-stage breast cancers in the early stage (165 breast cancer patient samples) where tumor grade is equal or smaller than 1 and tumors are equal or smaller than 2.5 centimeters. The expression of individual laminin subunits (LAMA1, LAMA2, LAMA3, LAMA4, LAMA5, LAMB1, LAMB2, LAMB3,

LAMB4, LAMB5, LAMC1, LAMC2, LAMC3) were totaled for each patient and then patients were stratified by high (in the top 25%) vs. low (in the bottom 25%) expression. Survival data was analyzed using a Kaplan Meier survival plot and *p*-values were calculated by log-rank testing.

### Real-time reverse transcription quantitative PCR (RT-qPCR)

RNA extraction and cDNA synthesis were performed as previously described [51]. The mRNA expression level of each integrin relative to 18S rRNA was calculated based on the threshold cycle ( $C_t$ ) as  $2^{-(\Delta C_t)}$ , where  $\Delta C_t = C_t(\text{target}) - C_t(18S)$ . Each experiment was performed three times in triplicate ( $N = 3 \times 3$ ). Gene expression values were normalized to ITGA1 expression to show fold change in expression between different integrins. Primers used for the RT-PCR are displayed in Supplementary Table S1.

### Statistical analysis

The number of cells examined for each experiment is indicated in the figure captions. Mean values  $\pm$  s.e.m. and statistical analysis were analyzed using Graphpad Prism (Graphpad Software, San Diego, CA). Two-tailed unpaired Student's *t*-tests and one-way ANOVA were conducted to determine significance of samples with 2 groups and  $>2$  groups, respectively as indicated by standard Michelin Guide (\*\*\*\**P* < 0.0001, \*\*\**P* < 0.001, \*\**P* < 0.01, and \**P* < 0.05).

### ACKNOWLEDGMENTS

This work was supported by the NIH (grants U54CA143868 and R01CA174388). D.M.G. is supported by the NCI (K99CA181352).

### REFERENCES

- Kelley LC, Lohmer LL, Hagedorn EJ, Sherwood DR. Traversing the basement membrane *in vivo*: a diversity of strategies. *The Journal of cell biology*. 2014; 204:291–302.
- Gabbert H. Mechanisms of tumor invasion: evidence from *in vivo* observations. *Cancer metastasis reviews*. 1985; 4:293–309.
- Mareel MM. Recent aspects of tumor invasiveness. *International review of experimental pathology*. 1980; 22:65–129.
- Wirtz D, Konstantopoulos K, Searson PC. The physics of cancer: the role of physical interactions and mechanical forces in metastasis. *Nature reviews Cancer*. 2011; 11:512–522.
- Even-Ram S, Yamada KM. Cell migration in 3D matrix. *Current opinion in cell biology*. 2005; 17:524–532.
- Kikuchi K, Takahashi K. WAVE2- and microtubule-dependent formation of long protrusions and invasion of cancer cells cultured on three-dimensional extracellular matrices. *Cancer science*. 2008; 99:2252–2259.
- Elliott H, Fischer RS, Myers KA, Desai RA, Gao L, Chen CS, Adelstein RS, Waterman CM, Danuser G. Myosin II controls cellular branching morphogenesis and migration in three dimensions by minimizing cell-surface curvature. *Nature cell biology*. 2015; 17:137–147.
- Fraley SI, Feng YF, Giri A, Longmore GD, Wirtz D. Dimensional and temporal controls of three-dimensional cell migration by zyxin and binding partners. *Nature communications*. 2012; 3.
- Fraley SI, Feng YF, Krishnamurthy R, Kim DH, Celedon A, Longmore GD, Wirtz D. A distinctive role for focal adhesion proteins in three-dimensional cell motility. *Nature cell biology*. 2010; 12:598–U169.
- Nguyen-Ngoc KV, Cheung KJ, Brenot A, Shamir ER, Gray RS, Hines WC, Yaswen P, Werb Z, Ewald AJ. ECM microenvironment regulates collective migration and local dissemination in normal and malignant mammary epithelium. *Proceedings of the National Academy of Sciences of the United States of America*. 2012; 109:E2595–2604.
- Poincloux R, Collin O, Lizarraga F, Romao M, Debray M, Piel M, Chavrier P. Contractility of the cell rear drives invasion of breast tumor cells in 3D Matrigel. *Proceedings of the National Academy of Sciences of the United States of America*. 2011; 108:1943–1948.
- Beck JN, Singh A, Rothenberg AR, Elisseeff JH, Ewald AJ. The independent roles of mechanical, structural and adhesion characteristics of 3D hydrogels on the regulation of cancer invasion and dissemination. *Biomaterials*. 2013; 34:9486–9495.
- Hanahan D, Weinberg RA. Hallmarks of cancer: the next generation. *Cell*. 2011; 144:646–674.
- Alexander S, Weigelin B, Winkler F, Friedl P. Preclinical intravital microscopy of the tumour-stroma interface: invasion, metastasis, and therapy response. *Current opinion in cell biology*. 2013; 25:659–671.
- de Visser KE, Eichten A, Coussens LM. Paradoxical roles of the immune system during cancer development. *Nature reviews Cancer*. 2006; 6:24–37.
- Quail DF, Joyce JA. Microenvironmental regulation of tumor progression and metastasis. *Nature medicine*. 2013; 19:1423–1437.
- Grivennikov SI, Greten FR, Karin M. Immunity, inflammation, and cancer. *Cell*. 2010; 140:883–899.
- Gaggioli C, Hooper S, Hidalgo-Carcedo C, Grosse R, Marshall JF, Harrington K, Sahai E. Fibroblast-led collective invasion of carcinoma cells with differing roles for RhoGTPases in leading and following cells. *Nature cell biology*. 2007; 9:1392–1400.

19. Husemann Y, Geigl JB, Schubert F, Musiani P, Meyer M, Burghart E, Forni G, Eils R, Fehm T, Riethmuller G, Klein CA. Systemic spread is an early step in breast cancer. *Cancer cell*. 2008; 13:58–68.
20. Klein CA. Parallel progression of primary tumours and metastases. *Nature reviews Cancer*. 2009; 9:302–312.
21. Rhim AD, Mirek ET, Aiello NM, Maitra A, Bailey JM, McAllister F, Reichert M, Beatty GL, Rustgi AK, Vonderheide RH, Leach SD, Stanger BZ. EMT and dissemination precede pancreatic tumor formation. *Cell*. 2012; 148:349–361.
22. Burdall SE, Hanby AM, Lansdown MR, Speirs V. Breast cancer cell lines: friend or foe? *Breast cancer research*. 2003; 5:89–95.
23. Wang CC, Bajikar SS, Jamal L, Atkins KA, Janes KA. A time- and matrix-dependent TGFBR3-JUND-KRT5 regulatory circuit in single breast epithelial cells and basal-like premalignancies. *Nature cell biology*. 2014; 16:345–356.
24. Lee MH, Wu PH, Staunton JR, Ros R, Longmore GD, Wirtz D. Mismatch in mechanical and adhesive properties induces pulsating cancer cell migration in epithelial monolayer. *Biophysical journal*. 2012; 102:2731–2741.
25. Guo Q, Phillip JM, Majumdar S, Wu PH, Chen J, Calderon-Colon X, Schein O, Smith BJ, Trexler MM, Wirtz D, Elisseeff JH. Modulation of keratocyte phenotype by collagen fibril nanoarchitecture in membranes for corneal repair. *Biomaterials*. 2013; 34:9365–9372.
26. Nagaraja GM, Othman M, Fox BP, Alsaber R, Pellegrino CM, Zeng Y, Khanna R, Tamburini P, Swaroop A, Kandpal RP. Gene expression signatures and biomarkers of noninvasive and invasive breast cancer cells: comprehensive profiles by representational difference analysis, microarrays and proteomics. *Oncogene*. 2006; 25:2328–2338.
27. Carpenter PM, Dao AV, Arain ZS, Chang MK, Nguyen HP, Arain S, Wang-Rodriguez J, Kwon SY, Wilczynski SP. Motility induction in breast carcinoma by mammary epithelial laminin 332 (laminin 5). *Molecular cancer research*. 2009; 7:462–475.
28. Giannelli G, Antonaci S. Biological and clinical relevance of Laminin-5 in cancer. *Clinical & experimental metastasis*. 2000; 18:439–443.
29. Domogatskaya A, Rodin S, Tryggvason K. Functional diversity of laminins. *Annual review of cell and developmental biology*. 2012; 28:523–553.
30. Belkin AM, Stepp MA. Integrins as receptors for laminins. *Microscopy research and technique*. 2000; 51:280–301.
31. Giri A, Bajpai S, Trenton N, Jayatilaka H, Longmore GD, Wirtz D. The Arp2/3 complex mediates multigeneration dendritic protrusions for efficient 3-dimensional cancer cell migration. *FASEB journal : official publication of the Federation of American Societies for Experimental Biology*. 2013; 27:4089–4099.
32. Kim DH, Wirtz D. Focal adhesion size uniquely predicts cell migration. *FASEB journal : official publication of the Federation of American Societies for Experimental Biology*. 2013; 27:1351–1361.
33. Riento K, Ridley AJ. Rocks: multifunctional kinases in cell behaviour. *Nature reviews Molecular cell biology*. 2003; 4:446–456.
34. Kim BG, An HJ, Kang S, Choi YP, Gao MQ, Park H, Cho NH. Laminin-332-rich tumor microenvironment for tumor invasion in the interface zone of breast cancer. *The American journal of pathology*. 2011; 178:373–381.
35. Holler E. Laminin isoform expression in breast tumors. *Breast cancer research : BCR*. 2005; 7:166–167.
36. Martin KJ, Kwan CP, Nagasaki K, Zhang X, O'Hare MJ, Kaelin CM, Burgeson RE, Pardee AB, Sager R. Down-regulation of laminin-5 in breast carcinoma cells. *Molecular medicine*. 1998; 4:602–613.
37. Boudreau A, van't Veer LJ, Bissell MJ. An “elite hacker”: breast tumors exploit the normal microenvironment program to instruct their progression and biological diversity. *Cell adhesion & migration*. 2012; 6:236–248.
38. Hotta A, Kawakatsu T, Nakatani T, Sato T, Matsui C, Sukezane T, Akagi T, Hamaji T, Grigoriev I, Akhmanova A, Takai Y, Mimori-Kiyosue Y. Laminin-based cell adhesion anchors microtubule plus ends to the epithelial cell basal cortex through LL5alpha/beta. *The Journal of cell biology*. 2010; 189:901–917.
39. Conde C, Caceres A. Microtubule assembly, organization and dynamics in axons and dendrites. *Nature reviews Neuroscience*. 2009; 10:319–332.
40. da Silva JS, Dotti CG. Breaking the neuronal sphere: regulation of the actin cytoskeleton in neuritogenesis. *Nature reviews Neuroscience*. 2002; 3:694–704.
41. Da Silva JS, Medina M, Zuliani C, Di Nardo A, Witke W, Dotti CG. RhoA/ROCK regulation of neuritogenesis via profilin Ila-mediated control of actin stability. *The Journal of cell biology*. 2003; 162:1267–1279.
42. Liu RY, Schmid RS, Snider WD, Maness PF. NGF enhances sensory axon growth induced by laminin but not by the L1 cell adhesion molecule. *Molecular and cellular neurosciences*. 2002; 20:2–12.
43. van't Veer LJ, Dai H, van de Vijver MJ, He YD, Hart AA, Mao M, Peterse HL, van der Kooy K, Marton MJ, Witteveen AT, Schreiber GJ, Kerkhoven RM, Roberts C, Linsley PS, Bernards R, Friend SH. Gene expression profiling predicts clinical outcome of breast cancer. *Nature*. 2002; 415:530–536.
44. Engel J, Eckel R, Kerr J, Schmidt M, Furstenberger G, Richter R, Sauer H, Senn HJ, Holzel D. The process of metastasis for breast cancer. *European journal of cancer*. 2003; 39:1794–1806.
45. Schmidt-Kittler O, Ragg T, Daskalakis A, Granzow M, Ahr A, Blankenstein TJ, Kaufmann M, Diebold J, Arnholdt H, Muller P, Bischoff J, Harich D, Schlimok G, Riethmuller G, Eils R, Klein CA. From latent disseminated cells to overt metastasis: genetic analysis of systemic breast

- cancer progression. *Proceedings of the National Academy of Sciences of the United States of America*. 2003; 100:7737–7742.
46. Friedl P, Wolf K. Tumour-cell invasion and migration: diversity and escape mechanisms. *Nature reviews Cancer*. 2003; 3:362–374.
  47. Chambliss AB, Wu PH, Chen WC, Sun SX, Wirtz D. Simultaneously defining cell phenotypes, cell cycle, and chromatin modifications at single-cell resolution. *FASEB journal : official publication of the Federation of American Societies for Experimental Biology*. 2013; 27:2667–2676.
  48. Chen WC, Wu PH, Phillip JM, Khatau SB, Choi JM, Dallas MR, Konstantopoulos K, Sun SX, Lee JS, Hodzic D, Wirtz D. Functional interplay between the cell cycle and cell phenotypes. *Integrative biology : quantitative biosciences from nano to macro*. 2013; 5:523–534.
  49. Lee MH, Padmashali R, Andreadis ST. JNK1 is required for lentivirus entry and gene transfer. *Journal of virology*. 2011; 85:2657–2665.
  50. Ringner M, Fredlund E, Hakkinen J, Borg A, Staaf J. GOBO: gene expression-based outcome for breast cancer online. *PloS one*. 2011; 6:e17911.
  51. Gilkes DM, Bajpai S, Wong CC, Chaturvedi P, Hubbi ME, Wirtz D, Semenza GL. Procollagen lysyl hydroxylase 2 is essential for hypoxia-induced breast cancer metastasis. *Molecular cancer research*. 2013; 11:456–466.
